# Supplementary material
Source: publisher figshare collection journal article supplement (https://acs.figshare.com/ndownloader/files/10280097)
Supplement: Supplementary file 1 [file 10280097]

Compound_ID	SMILES	ATPase activity (%Stimulation or Inhibition*)
		0.05 µM	0.5 µM	2.5 µM
1	O=C(NC1=C(C(C2=CC=CC=C2)=O)C=CC=C1)C3=CSC([C@H](C(C)C)NC(C4=CC(OC)=C(C(OC)=C4)OC)=O)=N3	54	83	88
5	O=C(C1=CSC([C@@H](NC(C2=CC=CC=C2C(C3=CC=CC=C3)=O)=O)C(C)C)=N1)NC4=CC(OC)=C(OC)C(OC)=C4	NA	46	ND
7	O=C(C1=CSC([C@@H](NC(C2=CC(OC)=C(OC)C(OC)=C2)=O)C(C)C)=N1)NC3=CC=CC(C(C4=CC=CC=C4)=O)=C3	13	143	ND
18	O=C(C1=CSC([C@@H](NC(C2=CC(OC)=C(OC)C(OC)=C2)=O)C(C)C)=N1)NC3=CC=CC=C3C(NC4=CC=CC=C4)=O	21	142	ND
19	O=C(C1=CSC([C@@H](NC(C2=CC(OC)=C(OC)C(OC)=C2)=O)C(C)C)=N1)NC3=CC=CC=C3NC(C4=CC=CC=C4)=O	NA	52	ND
20	O=C(C1=CSC([C@@H](NC(C2=CC(OC)=C(OC)C(OC)=C2)=O)C(C)C)=N1)NC3=CC=CC=C3OC4=CC=CC=C4	NA	88	ND
21	O=C(C1=CSC([C@@H](NC(C2=CC(OC)=C(OC)C(OC)=C2)=O)C(C)C)=N1)NC3=CC=CC=C3CC4=CC=CC=C4	15	112	ND
28	O=C(C1=CSC([C@@H](NC(C2=CC(OC)=C(OC)C(OC)=C2)=O)C(C)C)=N1)NC3=CC=CC=C3C(C4=CC=C(Br)C=C4)=O	309	149	ND
29	O=C(C1=CSC([C@@H](NC(C2=CC(OC)=C(OC)C(OC)=C2)=O)C(C)C)=N1)NC3=CC=CC=C3C(C4=CC=C(N=[N+]=[N-])C=C4)=O	ND	147.8±24.4	169.4±44.5
31	O=C(C1=CSC([C@@H](NC(C2=CC=CC(N)=C2)=O)C(C)C)=N1)NC3=CC=CC=C3C(C4=CC=CC=C4)=O	376	308	ND
32	O=C(C1=CSC([C@@H](NC(C2=CC=CC=C2N=[N+]=[N-])=O)C(C)C)=N1)NC3=CC=CC=C3C(C4=CC=CC=C4)=O	ND	142.0±8.3	182.0±29.2
33	O=C(C1=CSC([C@@H](NC(C2=CC=CC(N=[N+]=[N-])=C2)=O)C(C)C)=N1)NC3=CC=CC=C3C(C4=CC=CC=C4)=O	ND	121.7±15.8	194.5±24.5
34	O=C(C1=CSC([C@@H](NC(C2=CC=C(N=[N+]=[N-])C=C2)=O)C(C)C)=N1)NC3=CC=CC=C3C(C4=CC=CC=C4)=O	ND	134.9±10.3	164.2±40.5
35	O=C(C1=CSC([C@@H](NC(C2=CC=C(N=[N+]=[N-])C=C2)=O)C(C)C)=N1)NC3=CC=CC=C3C(C4=CC=C(Br)C=C4)=O	ND	99.4±3.5	84.7±8.6
36	O=C(C1=CSC([C@@H](NC(C2=CC(OC)=C(OC)C(OC)=C2)=O)C(C)C)=N1)NC3CC3	ND	NA	ND
37	O=C(C1=CSC([C@@H](NC(C2=CC(OC)=C(OC)C(OC)=C2)=O)C(C)C)=N1)NC3CCC3	ND	25.3±13.2	NA
38	O=C(C1=CSC([C@@H](NC(C2=CC(OC)=C(OC)C(OC)=C2)=O)C(C)C)=N1)NC3CCCC3	ND	NA	NA
39	O=C(C1=CSC([C@@H](NC(C2=CC(OC)=C(OC)C(OC)=C2)=O)C(C)C)=N1)NC3CCCCC3	20*	18*	ND
40	O=C(C1=CSC([C@@H](NC(C2=CC(OC)=C(OC)C(OC)=C2)=O)C(C)C)=N1)NC34CC5CC(C4)CC(C5)C3	NA	NA	ND
41	O=C(N1CCC(NC(C2=CSC([C@@H](NC(C3=CC(OC)=C(OC)C(OC)=C3)=O)C(C)C)=N2)=O)CC1)OC(C)(C)C	ND	52.7±11.2	48.0±13.9
42	O=C(C1=CSC([C@@H](NC(C2=CC(OC)=C(OC)C(OC)=C2)=O)C(C)C)=N1)NC3CCNCC3	ND	46.3±4.9	14.5±5.3
43	O=C(C1=CSC([C@@H](NC(C2=CC(OC)=C(OC)C(OC)=C2)=O)C(C)C)=N1)NC3CCOCC3	ND	26.9±18.9	NA
44	O=C(N[C@H](C1=NC(C(N2CCC(CC2)=O)=O)=CS1)C(C)C)C3=CC(OC)=C(OC)C(OC)=C3	ND	NA	NA
46	O=C(C1=CSC([C@@H](NC(C2=CC(OC)=C(OC)C(OC)=C2)=O)C(C)C)=N1)NCC3CCNCC3	ND	23.0±3.6	NA
48	O=C(N[C@H](C1=NC(C(N2CCC(N)CC2)=O)=CS1)C(C)C)C3=CC(OC)=C(OC)C(OC)=C3	ND	45.4±13.2	NA
50	O=C(C1=CSC([C@@H](NC(C2=CC(OC)=C(OC)C(OC)=C2)=O)C(C)C)=N1)NC[C@H]3CC[C@H](N)CC3	ND	NA	NA
51	O=C(C1=CSC([C@@H](NC(C2=CC(OC)=C(OC)C(OC)=C2)=O)C(C)C)=N1)NC(CC3)CCS3(=O)=O	ND	NA	NA
52	O=C(C1=CSC([C@@H](NC(C2=CC(OC)=C(OC)C(OC)=C2)=O)C(C)C)=N1)NC3CCC(CC3)=O	ND	13.1±0.3	NA
53	O=C(C1=CSC([C@@H](NC(C2=CC(OC)=C(OC)C(OC)=C2)=O)C(C)C)=N1)NC3CCC(F)(F)CC3	ND	30.7±4.9*	33.9±2.9*
54	O=C(C1=CSC([C@@H](NC(C2=CC(OC)=C(OC)C(OC)=C2)=O)C(C)C)=N1)NC3CCC(C)(C)CC3	ND	NA	34.3±3.6
55	O=C(C1=CSC([C@@H](NC(C2=CC(OC)=C(OC)C(OC)=C2)=O)C(C)C)=N1)N(C3CCCCC3)C4CCCCC4	ND	109	134
56	O=C(N[C@H](C1=NC(C(N2CCC(N3CCCCC3)CC2)=O)=CS1)C(C)C)C4=CC(OC)=C(OC)C(OC)=C4	ND	37.2±1.6	47.2±20.7
57	O=C(C1=CSC([C@@H](NC(C2=CC(OC)=C(OC)C(OC)=C2)=O)C(C)C)=N1)NC3CCN(CC4=CC=CC=C4)CC3	ND	169.1±16.3	153.5±21.2
58	O=C(C1=CSC([C@@H](NC(C2=CC(OC)=C(OC)C(OC)=C2)=O)C(C)C)=N1)NC3CCN(C4=NC=CC=N4)CC3	ND	17.1±6.6	83.0±18.2
59	O=C(C1=CSC([C@@H](NC(C2=CC(OC)=C(OC)C(OC)=C2)=O)C(C)C)=N1)N[C@H]3CCCC4=C3C=CC=C4	ND	108.5±17.3	122.8±24.3
60	O=C(C1=CSC([C@@H](NC(C2=CC(OC)=C(OC)C(OC)=C2)=O)C(C)C)=N1)N[C@@H]3CCCC4=C3C=CC=C4	ND	33.9±4.3	31.3±19.1
61	O=C(N[C@H](C1=NC(C(N2CCC(F)(F)CC2)=O)=CS1)C(C)C)C3=CC(OC)=C(OC)C(OC)=C3	ND	40.9±3.2	55.9±16.9
62	O=C(N[C@H](C1=NC(C(N2CCC(C(F)(F)F)CC2)=O)=CS1)C(C)C)C3=CC(OC)=C(OC)C(OC)=C3	ND	13.3±2.2	75.6±2.5
63	O=C(C1=CSC([C@@H](NC(C2=CC(OC)=C(OC)C(OC)=C2)=O)C(C)C)=N1)NCC3CCC(F)(F)CC3	ND	27.0±3.5*	20.7±10.3
64	O=C(C1=CSC([C@@H](NC(C2=CC(OC)=C(OC)C(OC)=C2)=O)C(C)C)=N1)NC3CCC(C(F)(F)F)CC3	ND	NA	21.7±9.0*
65	O=C(C1=CSC([C@@H](NC(C2=CC(OC)=C(OC)C(OC)=C2)=O)C(C)C)=N1)NC3=CC=C(F)C=C3	ND	59.5±3.5	244.4±3.4
66	O=C(C1=CSC([C@@H](NC(C2=CC(OC)=C(OC)C(OC)=C2)=O)C(C)C)=N1)NC3=CC(F)=C(F)C(F)=C3	ND	57.0±0.4	176.3±6.3
67	O=C(C1=CSC([C@@H](NC(C2=CC(OC)=C(OC)C(OC)=C2)=O)C(C)C)=N1)NCCCC(F)(F)F	ND	17.1±0.4	77.3±1.1
69	O=C(C1=CSC([C@@H](NC(C2=CSC=N2)=O)C(C)C)=N1)NC3CCC(F)(F)CC3	ND	ND	49.7±27.18
70	O=C(C1=CSC([C@@H](NC(C2=CN=CN=C2)=O)C(C)C)=N1)NC3CCC(F)(F)CC3	ND	ND	NA
71	O=C(C1=CSC([C@@H](NC(C2=CC3=CC=CC=C3N=C2)=O)C(C)C)=N1)NC4CCC(F)(F)CC4	ND	ND	83.9±27.0
72	O=C(C1=CSC([C@@H](NC(C2CCOCC2)=O)C(C)C)=N1)NC3CCC(F)(F)CC3	ND	ND	NA
73	O=C(C1=CSC([C@@H](NC(C2CCC(F)(F)CC2)=O)C(C)C)=N1)NC3CCC(F)(F)CC3	ND	NA	16.4±13.7*
74	O=C(C1=CSC([C@@H](NC(C2=CC=C(OC)C(OC)=C2)=O)C(C)C)=N1)NC3CCC(F)(F)CC3	ND	ND	11.9±8.03
75	O=C(C1=CSC([C@@H](NC(C2=CC=C(OC)C=C2)=O)C(C)C)=N1)NC3CCC(F)(F)CC3	ND	ND	35.8±14.2
76	O=C(C1=CSC([C@@H](NC(C2=CC=CC=C2)=O)C(C)C)=N1)NC3CCC(F)(F)CC3	ND	ND	10.5±11.12
77	O=C(C1=CSC([C@@H](N)C(C)C)=N1)NC2CCC(F)(F)CC2	ND	NA	NA
78	O=C(C1=CSC([C@@H](NC(C2=CC(F)=C(F)C(F)=C2)=O)C(C)C)=N1)NC3CCC(F)(F)CC3	ND	16.6±1.3*	23.3±0.1*
79	O=C(C1=CSC([C@@H](NC(CC2=CC(OC)=C(OC)C(OC)=C2)=O)C(C)C)=N1)NC3CCC(F)(F)CC3	ND	ND	70.2±19.7
80	O=C(C1=CSC([C@@H](NC(C(C2=CC(OC)=C(OC)C(OC)=C2)=O)=O)C(C)C)=N1)NC3CCC(F)(F)CC3	ND	ND	177.5±26.7
81	S=C(C1=CSC([C@@H](NC(C2=CC(OC)=C(OC)C(OC)=C2)=S)C(C)C)=N1)NC3CCCCC3	ND	65	92
82	O=C(N[C@H](C1=NC(C(NC2CCCCC2)=S)=CS1)C(C)C)C3=CC(OC)=C(OC)C(OC)=C3	ND	NA	27
83	S=C(C1=CSC([C@@H](NC(C2=CC(OC)=C(OC)C(OC)=C2)=S)C(C)C)=N1)NC3CCC(F)(F)CC3	ND	25	64
84	O=C(N[C@H](C1=NC(C(NC2CCC(F)(F)CC2)=S)=CS1)C(C)C)C3=CC(OC)=C(OC)C(OC)=C3	ND	37.4±5.5*	25.9±2.1*
101	O=C(C1=CSC(NC(C2=CC(OC)=C(OC)C(OC)=C2)=O)=N1)NC3CCC(F)(F)CC3	ND	53.9±0.6	60.2±2.7
107	O=C(C1=CSC(CNC(C2=CC(OC)=C(OC)C(OC)=C2)=O)=N1)NC3CCC(F)(F)CC3	ND	NA	13
108	O=C(C1=CSC(C(NC(C2=CC(OC)=C(OC)C(OC)=C2)=O)CC(C)C)=N1)NC3CCC(F)(F)CC3	ND	16	68
109	O=C(C1=CSC(C(NC(C2=CC(OC)=C(OC)C(OC)=C2)=O)CC3=CC=CC=C3)=N1)NC4CCC(F)(F)CC4	ND	39.6±4.7*	42.5±6.3*
110	O=C(C1=CSC(C(NC(C2=CC(OC)=C(OC)C(OC)=C2)=O)CC3=CC=C(O)C=C3)=N1)NC4CCC(F)(F)CC4	ND	22.4±4.9*	23.0±6.4*
111	O=C(C1=CSC(C2N(C(C3=CC(OC)=C(OC)C(OC)=C3)=O)CCC2)=N1)NC4CCC(F)(F)CC4	ND	NA	21
* indication ATPase inhibition
ATPase values below or equal to 10% are indicated as NA and ND means Not Determined
